# Supplementary material for: Discerning evolutionary trends in post-translational modification and the effect of intrinsic disorder: Analysis of methylation, acetylation and ubiquitination sites in human proteins
Source: PLoS Comput Biol. 2018 Aug 10;14(8):e1006349. doi: 10.1371/journal.pcbi.1006349 (PMC6105011; doi:10.1371/journal.pcbi.1006349)
Supplement: S1 File — The contents of each table are described in a table listing on the first sheet of the file. (XLSX) [file pcbi.1006349.s001.xlsx]

## Sheet: Table A-E
		APES										PRIMATES										SUPRAPRIMATES										EUTHERIA										MAMMALS
Table A: Conservation of MAU sites in ordered and disordered regions across all eukaryotic clade		Number of all K/R residues	Number of all conserved K/R residues	Number of MAU-modified sites	Number of conserved MAU-modified sites	Fraction: Number of MAU-conserved modified sites / Number of all conserved K/R residues	Number of all new conserved K/R residues	Number of new conserved MAU-modified sites	Fraction: Number of new conserved MAU-modified sites / Number of all new conserved K/R residues	Hypergeometric P-value	Hypergeometric P-value (New Conserved sites)	Number of all K/R residues	Number of all conserved K/R residues	Number of MAU-modified sites	Number of conserved MAU-modified sites	Fraction: Number of MAU-conserved modified sites / Number of all conserved K/R residues	Number of all new conserved K/R residues	Number of new conserved MAU-modified sites	Fraction: Number of new conserved MAU-modified sites / Number of all new conserved K/R residues	Hypergeometric P-value	Hypergeometric P-value (New Conserved sites)	Number of all K/R residues	Number of all conserved K/R residues	Number of MAU-modified sites	Number of conserved MAU-modified sites	Fraction: Number of MAU-conserved modified sites / Number of all conserved K/R residues	Number of all new conserved K/R residues	Number of new conserved MAU-modified sites	Fraction: Number of new conserved MAU-modified sites / Number of all new conserved K/R residues	Hypergeometric P-value	Hypergeometric P-value (New Conserved sites)	Number of all K/R residues	Number of all conserved K/R residues	Number of MAU-modified sites	Number of conserved MAU-modified sites	Fraction: Number of MAU-conserved modified sites / Number of all conserved K/R residues	Number of all new conserved K/R residues	Number of new conserved MAU-modified sites	Fraction: Number of new conserved MAU-modified sites / Number of all new conserved K/R residues	Hypergeometric P-value	Hypergeometric P-value (New Conserved sites)	Number of all K/R residues	Number of all conserved K/R residues	Number of MAU-modified sites	Number of conserved MAU-modified sites	Fraction: Number of MAU-conserved modified sites / Number of all conserved K/R residues	Number of all new conserved K/R residues	Number of new conserved MAU-modified sites	Fraction: Number of new conserved MAU-modified sites / Number of all new conserved K/R residues
Methylation- K	Order	4983	4737	371	356	0.0751531	1031	49	0.0475267	0.246702	0.99996	4252	3706	358	307	0.0828386	1011	61	0.0603363	0.820132	0.999512	3454	2695	292	246	0.0912801	805	52	0.0645963	0.00359866	0.992924	2670	1890	245	194	0.102646	274	47	0.171533	0.00119421	6.93514e-06	2400	1616	162	147	0.0909653	460	37	0.0804348
	Disorder	16541	15335	638	593	0.0386697	5951	112	0.0188204	0.445196	0.99999	12447	9384	607	481	0.0512575	4143	172	0.0415158	0.0125034	0.996817	8950	5241	486	309	0.0589582	2093	92	0.043956	0.0114503	0.993607	6622	3148	340	217	0.0689327	582	39	0.0670103	4.18785e-10	0.0488981	5409	2566	231	178	0.0693687	1209	72	0.0595533
Methylation -R	Order	2563	2360	191	171	0.0724576	782	40	0.0511509	0.928203	0.999216	1878	1578	167	131	0.0830165	358	25	0.0698324	0.982524	0.938234	1626	1220	127	106	0.0868852	459	31	0.0675381	0.0122441	0.864696	1148	761	109	75	0.0985545	181	19	0.104972	0.318981	0.350085	915	580	72	56	0.0965517	209	16	0.076555
	Disorder	20364	17973	1485	1289	0.0717187	6362	241	0.0378812	0.96659	1	14629	11611	1370	1048	0.0902592	3634	258	0.0709961	0.999	1	11797	7977	1172	790	0.0990347	2991	242	0.0809094	0.579204	0.99997	9188	4986	1015	548	0.109908	603	69	0.114428	0.587622	0.394482	8562	4383	828	479	0.109286	2302	193	0.0838401
Acetylation- K	Order	39416	37235	4610	4370	0.117363	9777	721	0.0737445	0.15867	0.9999	33428	27458	4511	3649	0.132894	8798	990	0.112526	0.9909	1	27116	18660	3869	2659	0.142497	7068	733	0.103707	0.559794	1	20115	11592	3249	1926	0.166149	1833	333	0.181669	0.0195616	0.00826139	17657	9759	2513	1593	0.163234	3782	463	0.122422
	Disorder	74873	68756	5434	5011	0.0728809	23373	1004	0.0429555	0.146315	1	59006	45383	5228	4007	0.088293	18894	1357	0.0718217	0.6914	1	46679	26489	4451	2650	0.100042	10885	860	0.0790078	4.01282e-05	0.9999	34342	15604	3583	1790	0.114714	2671	248	0.0928491	5.48095e-09	0.981226	30003	12933	2740	1542	0.11923	6216	537	0.08639
Ubiquitination - K	Order	50009	47203	8409	7974	0.16893	12037	1178	0.0978649	0.028647	0.9999	42395	35166	8233	6796	0.193255	9899	1635	0.165168	0.8638	1	36183	25267	7336	5161	0.204259	8709	1448	0.166265	0.1414	0.9999	28351	16558	6347	3713	0.224242	1834	430	0.23446	0.435593	0.13677	26162	14724	5317	3283	0.222969	5322	1040	0.195415
	Disorder	58522	53788	5987	5583	0.103796	18507	1196	0.0646242	2.23045e-05	1	45881	35281	5756	4387	0.124345	15743	1613	0.102458	0.9074	0.9999	33653	19538	4792	2774	0.14198	8283	917	0.110709	0.607379	1	24519	11255	3764	1857	0.164993	1861	266	0.142934	2.43393e-06	0.912478	21756	9394	2899	1591	0.169363	4619	665	0.143971
		APES										PRIMATES										SUPRAPRIMATES										EUTHERIA										MAMMALS
Table B: Conservation of MAU sites as other MAU residue type in ordered and disordered regions across all eukaryotic clades.		Number of all K/R residues	Number of all conserved K/R residues	Number of MAU-modified sites	Number of conserved MAU-modified sites	Fraction: Number of MAU-conserved modified sites / Number of all conserved K/R residues	Number of all new conserved K/R residues	Number of new conserved MAU-modified sites	Fraction: Number of new conserved MAU-modified sites / Number of all new conserved K/R residues	Hypergeometric P-value	Hypergeometric P-value (New Conserved sites)	Number of all K/R residues	Number of all conserved K/R residues	Number of MAU-modified sites	Number of conserved MAU-modified sites	Fraction: Number of MAU-conserved modified sites / Number of all conserved K/R residues	Number of all new conserved K/R residues	Number of new conserved MAU-modified sites	Fraction: Number of new conserved MAU-modified sites / Number of all new conserved K/R residues	Hypergeometric P-value	Hypergeometric P-value (New Conserved sites)	Number of all K/R residues	Number of all conserved K/R residues	Number of MAU-modified sites	Number of conserved MAU-modified sites	Fraction: Number of MAU-conserved modified sites / Number of all conserved K/R residues	Number of all new conserved K/R residues	Number of new conserved MAU-modified sites	Fraction: Number of new conserved MAU-modified sites / Number of all new conserved K/R residues	Hypergeometric P-value	Hypergeometric P-value (New Conserved sites)	Number of all K/R residues	Number of all conserved K/R residues	Number of MAU-modified sites	Number of conserved MAU-modified sites	Fraction: Number of MAU-conserved modified sites / Number of all conserved K/R residues	Number of all new conserved K/R residues	Number of new conserved MAU-modified sites	Fraction: Number of new conserved MAU-modified sites / Number of all new conserved K/R residues	Hypergeometric P-value	Hypergeometric P-value (New Conserved sites)	Number of all K/R residues	Number of all conserved K/R residues	Number of MAU-modified sites	Number of conserved MAU-modified sites	Fraction: Number of MAU-conserved modified sites / Number of all conserved K/R residues	Number of all new conserved K/R residues	Number of new conserved MAU-modified sites	Fraction: Number of new conserved MAU-modified sites / Number of all new conserved K/R residues
Methylation - K changed to R	Order	4983	4772	371	357	0.0748114	916	37	0.040393	0.38505	0.99999	4252	3856	358	320	0.0829876	923	54	0.0585049	0.836892	0.999615	3454	2933	292	266	0.0906921	825	55	0.0666667	0.000778964	0.98718	2670	2108	245	211	0.100095	291	58	0.199313	0.00177768	1.23037e-09	2400	1817	162	153	0.0842047	479	33	0.0688935
	Disorder	16541	15453	638	599	0.0387627	5183	70	0.0135057	0.350855	0.99999	12447	10270	607	529	0.0515093	3939	166	0.0421427	0.000869347	0.99191	8950	6331	486	363	0.0573369	2215	103	0.0465011	0.0263513	0.974142	6622	4116	340	260	0.0631681	728	59	0.081044	5.77786e-09	0.000199368	5409	3388	231	201	0.059327	1428	69	0.0483193
Methylation - R changed to K	Order	2563	2385	191	175	0.0733753	754	37	0.0490716	0.831914	0.999619	1878	1631	167	138	0.0846107	351	28	0.0797721	0.960905	0.777778	1626	1280	127	110	0.0859375	474	32	0.0675105	0.0127858	0.870045	1148	806	109	78	0.0967742	189	20	0.10582	0.419837	0.329214	915	617	72	58	0.0940032	206	16	0.0776699
	Disorder	20364	18103	1485	1293	0.0714246	6081	195	0.0320671	0.99007	1	14629	12022	1370	1098	0.0913326	3493	280	0.0801603	0.981324	0.99935	11797	8529	1172	818	0.0959081	3103	242	0.077989	0.979294	0.999999	9188	5426	1015	576	0.106156	607	77	0.126853	0.946944	0.104328	8562	4819	828	499	0.103548	2412	185	0.0766998
Acetylation - K changed to A,G,M,S,T	Order	39416	37566	4610	4405	0.11726	9102	598	0.0656998	0.21109	0.999	33423	28464	4511	3807	0.133748	8766	1008	0.11499	0.942892	1	27116	19698	3869	2799	0.142096	7200	719	0.0998611	0.681522	1	20115	12498	3249	2080	0.166427	1907	387	0.202937	0.00803647	2.90688e-07	17657	10591	2513	1693	0.159853	4005	512	0.12784
	Disorder	74873	69378	5434	5071	0.0730923	22036	814	0.0369396	0.0270959	0.99999	59006	47342	5229	4257	0.0899202	19078	1444	0.0756893	0.0126679	1	46679	28264	4451	2813	0.0995259	11111	846	0.0761408	7.24454e-05	1	34342	17153	3583	1967	0.114674	2780	311	0.111871	2.06674e-10	0.093642	30003	14373	2740	1656	0.115216	6694	580	0.0866448
		APES										PRIMATES										SUPRAPRIMATES										EUTHERIA										MAMMALS
Table C. Conservation of MAU sites filtered with ZORRO program in ordered and disordered regions across all eukaryotic clades.		Number of all K/R residues	Number of all conserved K/R residues	Number of MAU-modified sites	Number of conserved MAU-modified sites	Fraction: Number of MAU-conserved modified sites / Number of all conserved K/R residues	Number of all new conserved K/R residues	Number of new conserved MAU-modified sites	Fraction: Number of new conserved MAU-modified sites / Number of all new conserved K/R residues	Hypergeometric P-value	Hypergeometric P-value (New Conserved sites)	Number of all K/R residues	Number of all conserved K/R residues	Number of MAU-modified sites	Number of conserved MAU-modified sites	Fraction: Number of MAU-conserved modified sites / Number of all conserved K/R residues	Number of all new conserved K/R residues	Number of new conserved MAU-modified sites	Fraction: Number of new conserved MAU-modified sites / Number of all new conserved K/R residues	Hypergeometric P-value	Hypergeometric P-value (New Conserved sites)	Number of all K/R residues	Number of all conserved K/R residues	Number of MAU-modified sites	Number of conserved MAU-modified sites	Fraction: Number of MAU-conserved modified sites / Number of all conserved K/R residues	Number of all new conserved K/R residues	Number of new conserved MAU-modified sites	Fraction: Number of new conserved MAU-modified sites / Number of all new conserved K/R residues	Hypergeometric P-value	Hypergeometric P-value (New Conserved sites)	Number of all K/R residues	Number of all conserved K/R residues	Number of MAU-modified sites	Number of conserved MAU-modified sites	Fraction: Number of MAU-conserved modified sites / Number of all conserved K/R residues	Number of all new conserved K/R residues	Number of new conserved MAU-modified sites	Fraction: Number of new conserved MAU-modified sites / Number of all new conserved K/R residues	Hypergeometric P-value	Hypergeometric P-value (New Conserved sites)	Number of all K/R residues	Number of all conserved K/R residues	Number of MAU-modified sites	Number of conserved MAU-modified sites	Fraction: Number of MAU-conserved modified sites / Number of all conserved K/R residues	Number of all new conserved K/R residues	Number of new conserved MAU-modified sites	Fraction: Number of new conserved MAU-modified sites / Number of all new conserved K/R residues
Methylation - K	Order	4163	4057	354	347	0.0855312	685	90	0.131387	0.30879	4.28915e-06	3881	3372	267	257	0.0762159	806	40	0.0496278	8.20732e-08	0.994982	3302	2566	231	217	0.0845674	735	29	0.0394558	4.20414e-12	0.999966	2571	1831	200	188	0.102676	214	42	0.196262	5.51226e-17	3.60649e-09	2375	1617	155	146	0.0902907	562	44	0.0782918
	Disorder	13629	13214	585	568	0.0429847	5507	134	0.0243327	0.483384	1	11049	8893	469	434	0.0488024	3917	145	0.0370181	8.19414e-14	0.984796	7899	4976	330	289	0.0580788	2490	92	0.0369478	1.65787e-24	0.936474	4814	2486	237	197	0.0792438	9	20	2.22222	2.83272e-25	0	4786	2477	215	177	0.0714574	1251	82	0.0655476
Methylation - R	Order	1934	1839	179	165	0.0897227	483	59	0.122153	0.975059	0.00722604	1603	1356	113	106	0.0781711	222	7	0.0315315	0.00178525	0.997623	1512	1134	107	99	0.0873016	386	25	0.0647668	1.42912e-06	0.738259	1113	748	82	74	0.0989305	169	18	0.106509	4.71129e-07	0.0578232	892	579	65	56	0.0967185	208	16	0.0769231
	Disorder	16225	15655	1244	1196	0.0763973	4644	256	0.0551249	0.781578	1	13252	11011	1049	940	0.0853692	3178	178	0.0560101	3.83754e-10	1	11029	7833	977	762	0.0972807	3241	256	0.078988	1.57945e-07	0.990476	8258	4592	778	506	0.110192	335	35	0.104478	1.23413e-08	0.281847	7805	4257	739	471	0.110641	2311	208	0.0900043
Acetylation - K	Order	34580	33488	4343	4244	0.126732	7044	944	0.134015	0.000139924	0.00921593	31797	26444	3781	3300	0.124792	8020	737	0.0918953	6.69205e-14	1	26546	18424	3338	2563	0.139112	7243	691	0.0954025	2.90844e-24	1	19200	11181	2721	1872	0.167427	1442	288	0.199723	1.44865e-34	2.09018e-10	17360	9739	2407	1584	0.162645	4055	558	0.137608
	Disorder	63629	61649	4877	4769	0.0773573	18058	1061	0.0587551	5.21888e-05	1	54322	43591	4232	3708	0.0850634	17545	1104	0.0629239	5.63917e-40	1	43650	26046	3532	2604	0.099977	12181	965	0.0792217	2.9032e-74	0.795753	28743	13865	2549	1639	0.118211	1116	112	0.100358	1.56277e-65	0.0908242	27770	12749	2465	1527	0.119774	6706	662	0.0987176
Ubiquitination - K	Order	43818	42540	7969	7779	0.182863	8580	1555	0.181235	0.000804057	0.572398	40376	33960	7106	6224	0.183274	9002	1205	0.133859	7.44655e-20	1	35380	24958	6592	5019	0.201098	8779	1377	0.156852	1.83541e-29	1	27308	16179	5438	3642	0.225107	1473	374	0.253904	2.66682e-39	8.47821e-08	25669	14706	5100	3268	0.222222	5567	1066	0.191486
	Disorder	50229	48661	5487	5350	0.109944	14728	1342	0.091119	0.00216082	1	42320	33933	4620	4008	0.118115	14823	1311	0.0884436	1.96029e-35	1	31308	19110	3740	2697	0.14113	8781	960	0.109327	1.22328e-51	0.999763	20977	10329	2730	1737	0.168167	1035	161	0.155556	3.52399e-59	0.00826862	20416	9294	2614	1576	0.169572	4970	718	0.144467
		APES										PRIMATES										SUPRAPRIMATES										EUTHERIA										MAMMALS
Table D. Conservation of MAU sites in non-histone proteins in ordered and disordered regions across all eukaryotic clades.		Number of all K/R residues	Number of all conserved K/R residues	Number of MAU-modified sites	Number of conserved MAU-modified sites	Fraction: Number of MAU-conserved modified sites / Number of all conserved K/R residues	Number of all new conserved K/R residues	Number of new conserved MAU-modified sites	Fraction: Number of new conserved MAU-modified sites / Number of all new conserved K/R residues	Hypergeometric P-value	Hypergeometric P-value (New Conserved sites)	Number of all K/R residues	Number of all conserved K/R residues	Number of MAU-modified sites	Number of conserved MAU-modified sites	Fraction: Number of MAU-conserved modified sites / Number of all conserved K/R residues	Number of all new conserved K/R residues	Number of new conserved MAU-modified sites	Fraction: Number of new conserved MAU-modified sites / Number of all new conserved K/R residues	Hypergeometric P-value	Hypergeometric P-value (New Conserved sites)	Number of all K/R residues	Number of all conserved K/R residues	Number of MAU-modified sites	Number of conserved MAU-modified sites	Fraction: Number of MAU-conserved modified sites / Number of all conserved K/R residues	Number of all new conserved K/R residues	Number of new conserved MAU-modified sites	Fraction: Number of new conserved MAU-modified sites / Number of all new conserved K/R residues	Hypergeometric P-value	Hypergeometric P-value (New Conserved sites)	Number of all K/R residues	Number of all conserved K/R residues	Number of MAU-modified sites	Number of conserved MAU-modified sites	Fraction: Number of MAU-conserved modified sites / Number of all conserved K/R residues	Number of all new conserved K/R residues	Number of new conserved MAU-modified sites	Fraction: Number of new conserved MAU-modified sites / Number of all new conserved K/R residues	Hypergeometric P-value	Hypergeometric P-value (New Conserved sites)	Number of all K/R residues	Number of all conserved K/R residues	Number of MAU-modified sites	Number of conserved MAU-modified sites	Fraction: Number of MAU-conserved modified sites / Number of all conserved K/R residues	Number of all new conserved K/R residues	Number of new conserved MAU-modified sites	Fraction: Number of new conserved MAU-modified sites / Number of all new conserved K/R residues
Methylation - K	Order	4586	4343	262	248	0.0571034	1015	43	0.0423645	0.583819	0.992695	3855	3328	249	205	0.0615986	919	41	0.0446137	0.97401	0.9986	3157	2409	209	164	0.068078	783	44	0.0561941	0.251589	0.918348	2386	1626	169	120	0.0738007	113	10	0.0884956	0.230376	0.2758	2288	1513	125	110	0.0727032	410	24	0.0585366
	Disorder	16053	14865	569	526	0.0353851	5882	110	0.0187011	0.59762	1	12008	8983	539	416	0.0463097	3937	151	0.0383541	0.10536	0.9935	8688	5046	440	265	0.0525168	2027	82	0.0404539	0.187622	0.993781	6411	3019	303	183	0.0606161	525	28	0.0533333	1.31622e-06	0.275992	5281	2494	208	155	0.0621492	1167	60	0.0514139
Methylation - R	Order	2280	2088	162	144	0.0689655	758	39	0.0514512	0.918783	0.996736	1595	1330	138	105	0.0789474	299	21	0.0702341	0.9925	0.8919	1436	1031	105	84	0.0814743	441	30	0.0680272	0.0309439	0.724192	976	590	88	54	0.0915254	93	9	0.0967742	0.474992	0.465647	831	497	61	45	0.0905433	162	11	0.0679012
	Disorder	20257	17876	1460	1266	0.0708212	6345	239	0.0376675	0.971781	1	14538	11531	1346	1027	0.0890643	3614	254	0.0702822	0.9978	1	11737	7917	1155	773	0.097638	2985	241	0.080737	0.669335	0.999943	9134	4932	999	532	0.107867	577	61	0.105719	0.703073	0.635148	8534	4355	820	471	0.108152	2285	190	0.083151
Acetylation - K	Order	38785	36607	4217	3979	0.108695	9756	707	0.0724682	0.550888	1	32797	26851	4118	3272	0.121858	8607	883	0.102591	0.99999	1	26677	18244	3591	2389	0.130947	7035	714	0.101493	0.995175	1	19689	11209	2983	1675	0.149433	1605	183	0.114019	0.829604	0.999997	17481	9604	2406	1492	0.155352	3698	404	0.109248
	Disorder	74366	68269	5351	4932	0.0722436	23287	994	0.0426848	0.160215	1	58548	44982	5148	3938	0.0875461	18628	1312	0.0704316	0.729995	1	46499	26354	4415	2626	0.0996433	10849	851	0.0784404	4.0144e-05	1	34162	15505	3549	1775	0.114479	2638	245	0.0928734	2.92932e-09	0.976466	29856	12867	2712	1530	0.118909	6164	527	0.0854964
Ubiquitination - K	Order	49388	46586	8078	7643	0.164062	12020	1167	0.0970882	0.114789	1	41774	34566	7902	6476	0.187352	9717	1537	0.158176	0.981081	1	35748	24849	7110	4939	0.198761	8668	1428	0.164744	0.543684	1	27943	16181	6128	3511	0.216983	1619	315	0.194565	0.867401	0.994431	25987	14562	5220	3196	0.219475	5234	996	0.190294
	Disorder	57903	53178	5809	5409	0.101715	18467	1196	0.0647642	7.44357e-05	1	45262	34711	5578	4213	0.121374	15473	1533	0.0990758	0.985992	1	33287	19238	4690	2680	0.139308	8210	905	0.110231	0.83905	1	24174	11028	3668	1775	0.160954	1747	230	0.131654	0.00013724	0.993802	21567	9281	2842	1545	0.166469	4544	637	0.140185
		Apes					Primates					Supraprimates					Eutheria					Mammals					Tetrapods					Vertebrates					Chordates					Deuterostomes					Metazoans
Table E. Conservation of new MAU sites in 'old' proteins in ordered and disordered regions across all eukaryotic clades.		Number of all K/R residues	Number of all new conserved K/R residues	Number of MAU-modified sites	Number of new conserved MAU-modified sites	Hypergeometric P-value (New Conserved sites)	Number of all Ks/Rs	Number of all new conserved Ks/Rs	Number of modified Ks/Rs	Number of new conserved modified Ks/Rs	Hypergeometric test for Enrichment	Number of all Ks/Rs	Number of all new conserved Ks/Rs	Number of modified Ks/Rs	Number of new conserved modified Ks/Rs	Hypergeometric test for Enrichment	Number of all Ks/Rs	Number of all new conserved Ks/Rs	Number of modified Ks/Rs	Number of new conserved modified Ks/Rs	Hypergeometric test for Enrichment	Number of all Ks/Rs	Number of all new conserved Ks/Rs	Number of modified Ks/Rs	Number of new conserved modified Ks/Rs	Hypergeometric test for Enrichment	Number of all Ks/Rs	Number of all new conserved Ks/Rs	Number of modified Ks/Rs	Number of new conserved modified Ks/Rs	Hypergeometric test for Enrichment	Number of all Ks/Rs	Number of all new conserved Ks/Rs	Number of modified Ks/Rs	Number of new conserved modified Ks/Rs	Hypergeometric test for Enrichment	Number of all Ks/Rs	Number of all new conserved Ks/Rs	Number of modified Ks/Rs	Number of new conserved modified Ks/Rs	Hypergeometric test for Enrichment	Number of all Ks/Rs	Number of all new conserved Ks/Rs	Number of modified Ks/Rs	Number of new conserved modified Ks/Rs	Hypergeometric test for Enrichment	Number of all Ks/Rs	Number of all new conserved Ks/Rs	Number of modified Ks/Rs
Methylation - K	Order	4983	1040	371	49	0.999972	4240	1002	358	61	0.999387	3454	842	292	61	0.937782	2630	257	236	38	0.0009051	2380	458	158	40	0.0315846	1820	516	145	43	0.390621	1213	248	103	11	0.997985	831	73	75	7	0.495451	726	164	62	22	0.0109116	350	48	46
	Disorder	16541	5951	638	112	1	12447	4143	607	172	0.996817	8950	2093	486	92	0.9936	6622	587	340	39	0.054476	5392	1208	229	73	0.0004632	3611	920	209	47	0.865785	1411	197	138	20	0.466051	990	95	79	6	0.792276	742	110	56	18	0.00050545	261	26	47
Methylation - R	Order	2563	782	191	25	1	1878	358	166	25	0.933542	1626	459	127	31	0.86469	1148	181	109	19	0.35008	915	227	72	17	0.644121	703	132	58	17	0.02868	484	53	32	6	0.12378	345	6	21	1	0.3159	331	70	16	6	0.096655	203	26	13
	Disorder	20364	6379	1485	117	0.999999	14609	3617	1368	256	1	11797	2991	1172	242	0.99996	9188	608	1015	70	0.3722	8552	2310	827	197	0.987344	5434	1446	765	164	0.999841	2450	356	522	63	0.97098	1096	100	229	11	0.997849	832	138	172	32	0.244558	298	25	93
Acetylation - K	Order	39416	9807	4610	107	0.999999	33380	8768	4503	986	0.999999	27116	7279	3869	771	1	19763	1687	3199	318	0.0012628	17530	3800	2487	475	0.999702	12696	2731	2394	475	0.987715	8419	1315	1527	208	0.992765	5868	320	997	51	0.71986	5195	1053	887	209	0.00465354	2186	213	697
	Disorder	74852	23404	5432	217	1	58948	18842	5215	1349	1	46679	11055	4451	874	0.9999	33920	2581	3550	243	0.96904	29823	6288	2729	550	0.899263	19532	4593	2562	585	0.815146	9528	938	1573	172	0.0629051	6211	362	724	53	0.0441148	5168	620	590	149	1.10946e-21	596	30	362
Ubiquitination - K	Order	49994	12088	8406	1194	1	42307	9836	8209	1617	1	36183	8827	7336	1479	1	28092	1767	6306	418	0.11015	26071	5313	5293	1031	0.967572	20115	4075	5018	819	1	14243	2175	3684	508	0.998429	10014	571	2593	115	0.999609	8648	1682	2245	422	0.825887	4252	376	1833
	Disorder	58519	18563	5986	1211	0.999999	45803	15684	5735	1597	0.99999	33653	8422	4792	926	1	24314	1830	3736	278	0.59583	21500	4546	2866	649	0.967572	14019	3166	2582	478	1	6904	826	1654	197	0.545672	4361	206	836	52	0.0168628	3509	443	676	140	1.78065e-11	790	80	409
[truncated: 58 more columns]

## Sheet: Table F and Table G
		APES										PRIMATES										SUPRAPRIMATES										EUTHERIA										MAMMALS
Table F: Conservation of MAU sites in ordered and disordered regions of histone proteins across all eukaryotic clades.		Number of all K/R residues	Number of all conserved K/R residues	Number of MAU-modified sites	Number of conserved MAU-modified sites	Fraction: Number of MAU-conserved modified sites / Number of all conserved K/R residues	Number of all new conserved K/R residues	Number of new conserved MAU-modified sites	Fraction: Number of new conserved MAU-modified sites / Number of all new conserved K/R residues	Hypergeometric P-value	Hypergeometric P-value (New Conserved sites)	Number of all K/R residues	Number of all conserved K/R residues	Number of MAU-modified sites	Number of conserved MAU-modified sites	Fraction: Number of MAU-conserved modified sites / Number of all conserved K/R residues	Number of all new conserved K/R residues	Number of new conserved MAU-modified sites	Fraction: Number of new conserved MAU-modified sites / Number of all new conserved K/R residues	Hypergeometric P-value	Hypergeometric P-value (New Conserved sites)	Number of all K/R residues	Number of all conserved K/R residues	Number of MAU-modified sites	Number of conserved MAU-modified sites	Fraction: Number of MAU-conserved modified sites / Number of all conserved K/R residues	Number of all new conserved K/R residues	Number of new conserved MAU-modified sites	Fraction: Number of new conserved MAU-modified sites / Number of all new conserved K/R residues	Hypergeometric P-value	Hypergeometric P-value (New Conserved sites)	Number of all K/R residues	Number of all conserved K/R residues	Number of MAU-modified sites	Number of conserved MAU-modified sites	Fraction: Number of MAU-conserved modified sites / Number of all conserved K/R residues	Number of all new conserved K/R residues	Number of new conserved MAU-modified sites	Fraction: Number of new conserved MAU-modified sites / Number of all new conserved K/R residues	Hypergeometric P-value	Hypergeometric P-value (New Conserved sites)	Number of all K/R residues	Number of all conserved K/R residues	Number of MAU-modified sites	Number of conserved MAU-modified sites	Fraction: Number of MAU-conserved modified sites / Number of all conserved K/R residues	Number of all new conserved K/R residues	Number of new conserved MAU-modified sites	Fraction: Number of new conserved MAU-modified sites / Number of all new conserved K/R residues
Methylation- K	Order	397	394	109	108	0.274112	16	6	0.375	0.815928	0.256	397	378	109	102	0.269841	92	20	0.217391	0.8834	0.899039	297	286	83	82	0.286713	22	8	0.363636	0.138215	0.247006	284	264	76	74	0.280303	161	37	0.229814	0.0596912	0.962257	112	103	37	37	0.359223	50	13	0.26
	Disorder	488	470	69	67	0.142553	69	2	0.0289855	0.519698	0.999	439	401	68	65	0.162095	206	21	0.101942	0.0456024	0.997291	262	195	46	44	0.225641	66	10	0.151515	5.82149e-05	0.78	211	129	37	34	0.263566	57	11	0.192982	6.34238e-06	0.41096	128	72	23	23	0.319444	42	12	0.285714
Methylation -R	Order	283	272	29	27	0.0992647	24	1	0.0416667	0.908985	0.9336	283	248	29	26	0.104839	59	4	0.0677966	0.504139	0.8951	190	189	22	22	0.116402	18	1	0.0555556	0.884211	0.9025	172	171	21	21	0.122807	88	10	0.113636	0.877907	0.7188	84	83	11	11	0.13253	47	5	0.106383
	Disorder	107	97	25	23	0.237113	17	2	0.117647	0.573692	0.948	91	80	24	21	0.2625	20	4	0.2	0.681227	0.8462	60	60	17	17	0.283333	6	1	0.166667	1	0.8782	54	54	16	16	0.296296	26	8	0.307692	1	0.5475	28	28	8	8	0.285714	17	3	0.176471
Acetylation - K	Order	631	628	393	391	0.622611	21	14	0.666667	0.759101	0.4306	631	607	393	377	0.621087	191	107	0.560209	0.744027	0.9867	439	416	278	270	0.649038	33	19	0.575758	0.0041133	0.816758	426	383	266	251	0.655352	228	150	0.657895	0.000105615	0.0762522	176	155	107	101	0.651613	84	59	0.702381
	Disorder	507	487	83	79	0.162218	86	10	0.116279	0.783588	0.9329	458	401	80	69	0.17207	266	45	0.169173	0.724237	0.6888	180	135	36	24	0.177778	36	9	0.25	0.931229	0.266713	180	99	34	15	0.151515	33	3	0.0909091	0.938322	0.974631	147	66	28	12	0.181818	52	10	0.192308
Ubiquitination - K	Order	621	617	331	331	0.536467	17	11	0.647059	0.0470336	0.2405	621	600	331	320	0.533333	182	98	0.538462	0.552266	0.4656	435	418	226	222	0.5311	41	20	0.487805	0.0149622	0.723	408	377	219	202	0.535809	215	115	0.534884	0.477606	0.492366	175	162	97	87	0.537037	88	44	0.5
	Disorder	619	610	178	174	0.285246	40	0	0	0.917246	NA	619	570	178	174	0.305263	270	80	0.296296	5.19145e-05	0.303982	366	300	102	94	0.313333	73	12	0.164384	0.000211674	0.990888	345	227	96	82	0.361233	114	36	0.315789	6.03313e-07	0.167155	189	113	57	46	0.40708	75	28	0.373333
		APES										PRIMATES										SUPRAPRIMATES										EUTHERIA										MAMMALS
Table G: Conservation of MAU sites in as other MAU residue type in ordered and disordered regions of histone proteins across all eukaryotic clades.		Number of all K/R residues	Number of all conserved K/R residues	Number of MAU-modified sites	Number of conserved MAU-modified sites	Fraction: Number of MAU-conserved modified sites / Number of all conserved K/R residues	Number of all new conserved K/R residues	Number of new conserved MAU-modified sites	Fraction: Number of new conserved MAU-modified sites / Number of all new conserved K/R residues	Hypergeometric P-value	Hypergeometric P-value (New Conserved sites)	Number of all K/R residues	Number of all conserved K/R residues	Number of MAU-modified sites	Number of conserved MAU-modified sites	Fraction: Number of MAU-conserved modified sites / Number of all conserved K/R residues	Number of all new conserved K/R residues	Number of new conserved MAU-modified sites	Fraction: Number of new conserved MAU-modified sites / Number of all new conserved K/R residues	Hypergeometric P-value	Hypergeometric P-value (New Conserved sites)	Number of all K/R residues	Number of all conserved K/R residues	Number of MAU-modified sites	Number of conserved MAU-modified sites	Fraction: Number of MAU-conserved modified sites / Number of all conserved K/R residues	Number of all new conserved K/R residues	Number of new conserved MAU-modified sites	Fraction: Number of new conserved MAU-modified sites / Number of all new conserved K/R residues	Hypergeometric P-value	Hypergeometric P-value (New Conserved sites)	Number of all K/R residues	Number of all conserved K/R residues	Number of MAU-modified sites	Number of conserved MAU-modified sites	Fraction: Number of MAU-conserved modified sites / Number of all conserved K/R residues	Number of all new conserved K/R residues	Number of new conserved MAU-modified sites	Fraction: Number of new conserved MAU-modified sites / Number of all new conserved K/R residues	Hypergeometric P-value	Hypergeometric P-value (New Conserved sites)	Number of all K/R residues	Number of all conserved K/R residues	Number of MAU-modified sites	Number of conserved MAU-modified sites	Fraction: Number of MAU-conserved modified sites / Number of all conserved K/R residues	Number of all new conserved K/R residues	Number of new conserved MAU-modified sites	Fraction: Number of new conserved MAU-modified sites / Number of all new conserved K/R residues
Methylation - K changed to R	Order	397	395	109	108	0.273418	13	5	0.384615	0.92512	0.2689	397	382	109	103	0.269634	86	20	0.232558	0.915836	0.8699	297	296	83	83	0.280405	18	7	0.388889	0.720539	0.209227	284	278	76	76	0.273381	171	39	0.22807	0.151342	0.976116	112	107	37	37	0.345794	48	11	0.229167
	Disorder	488	474	69	67	0.14135	48	0	0	0.683898	NA	439	426	68	67	0.157277	199	21	0.105528	0.375626	0.997215	262	227	46	46	0.202643	55	9	0.163636	0.000679764	0.67	211	172	37	37	0.215116	77	14	0.181818	0.000228305	0.495904	128	95	23	23	0.242105	51	9	0.176471
Methylation - R changed to K	Order	283	274	29	27	0.0985401	24	1	0.0416667	0.946603	0.9336	283	250	29	26	0.104	61	4	0.0655738	0.55401	0.9109	190	189	22	22	0.116402	18	1	0.0555556	0.884211	0.9025	172	171	21	21	0.122807	88	10	0.113636	0.877907	0.7188	84	83	11	11	0.13253	46	4	0.0869565
	Disorder	107	100	25	23	0.23	18	2	0.111111	0.795422	0.96	91	82	24	21	0.256098	22	4	0.181818	0.818232	0.9028	60	60	17	17	0.283333	6	1	0.166667	1	0.8782	54	54	16	16	0.296296	26	8	0.307692	1	0.5475	28	28	8	8	0.285714	16	2	0.125
Acetylation - K changed to A,G,M,S,T	Order	631	630	393	393	0.62381	19	15	0.789474	0.377179	0.097	631	611	393	378	0.618658	191	107	0.560209	0.927073	0.9867	439	420	278	271	0.645238	31	17	0.548387	0.015168	0.885969	426	389	266	254	0.652956	233	153	0.656652	0.000106722	0.0794457	176	156	107	101	0.647436	79	56	0.708861
	Disorder	507	488	83	79	0.161885	80	8	0.1	0.814985	0.972705	458	408	80	71	0.17402	265	44	0.166038	0.630273	0.757	180	143	36	27	0.188811	30	5	0.166667	0.834222	0.768351	180	113	34	22	0.19469	34	4	0.117647	0.479828	0.928607	147	79	28	18	0.227848	58	14	0.241379
[truncated: 58 more columns]

## Sheet: Table H
		APES										PRIMATES										SUPRAPRIMATES										EUTHERIA										MAMMALS
Table H: Conservation of sites with multiple MAUs in ordered and disordered regions across all eukaryotic clades.		Number of all K/R residues	Number of all conserved K/R residues	Number of MAU-modified sites	Number of conserved MAU-modified sites	Fraction: Number of MAU-conserved modified sites / Number of all conserved K/R residues	Number of all new conserved K/R residues	Number of new conserved MAU-modified sites	Fraction: Number of new conserved MAU-modified sites / Number of all new conserved K/R residues	Hypergeometric P-value	Hypergeometric P-value (New Conserved sites)	Number of all K/R residues	Number of all conserved K/R residues	Number of MAU-modified sites	Number of conserved MAU-modified sites	Fraction: Number of MAU-conserved modified sites / Number of all conserved K/R residues	Number of all new conserved K/R residues	Number of new conserved MAU-modified sites	Fraction: Number of new conserved MAU-modified sites / Number of all new conserved K/R residues	Hypergeometric P-value	Hypergeometric P-value (New Conserved sites)	Number of all K/R residues	Number of all conserved K/R residues	Number of MAU-modified sites	Number of conserved MAU-modified sites	Fraction: Number of MAU-conserved modified sites / Number of all conserved K/R residues	Number of all new conserved K/R residues	Number of new conserved MAU-modified sites	Fraction: Number of new conserved MAU-modified sites / Number of all new conserved K/R residues	Hypergeometric P-value	Hypergeometric P-value (New Conserved sites)	Number of all K/R residues	Number of all conserved K/R residues	Number of MAU-modified sites	Number of conserved MAU-modified sites	Fraction: Number of MAU-conserved modified sites / Number of all conserved K/R residues	Number of all new conserved K/R residues	Number of new conserved MAU-modified sites	Fraction: Number of new conserved MAU-modified sites / Number of all new conserved K/R residues	Hypergeometric P-value	Hypergeometric P-value (New Conserved sites)	Number of all K/R residues	Number of all conserved K/R residues	Number of MAU-modified sites	Number of conserved MAU-modified sites	Fraction: Number of MAU-conserved modified sites / Number of all conserved K/R residues	Number of all new conserved K/R residues	Number of new conserved MAU-modified sites	Fraction: Number of new conserved MAU-modified sites / Number of all new conserved K/R residues
Sites with multiple MAUs	ORDER	15492	14785	1836	1773	0.119919	1939	211	0.108819	0.00634722	0.92756	13854	12846	1698	1562	0.121594	2349	200	0.0851426	0.900707	1	11258	10497	1449	1362	0.129751	1476	236	0.159892	0.119776	0.000105912	10985	9021	1223	1126	0.12482	773	205	0.265201	9.06932e-26	1.56059e-35	9523	8248	1098	921	0.111663	1351	156	0.11547
	DISORDER	10664	9849	676	640	0.0649812	1577	91	0.0577045	0.0091915	0.855792	8521	8272	592	549	0.0663685	2270	114	0.0502203	1	0.999994	7258	6002	487	435	0.0724758	370	148	0.4	1.6601e-05	1.46678e-82	6213	5632	321	287	0.0509588	1307	100	0.0765111	0.812753	8.28108e-06	5124	4325	234	187	0.043237	1547	90	0.0581771
[truncated: 59 more columns]

## Sheet: Table I and Table J
		Apes					Primates					Supraprimates					Eutheria					Mammals					Tetrapods					Vertebrates					Chordates					Deuterostomia					Metazoa
Table I: Conservation of MAU sites in FB (treated as a sample of ordered and disordered) regions across all eukaryotic clades.		Number of conserved K/R residues in O/DO and FB regions	Number of conserved MAU-modified K/R sites in O/DO and FB regions	Number of conserved K/R residues in FB regions	Number of conserved MAU-modified K/R sites in FB regions	Hypergeometric P-value	Number of conserved K/R residues in O/DO and FB regions	Number of conserved MAU-modified K/R sites in O/DO and FB regions	Number of conserved K/R residues in FB regions	Number of conserved MAU-modified K/R sites in FB regions	Hypergeometric P-value	Number of conserved K/R residues in O/DO and FB regions	Number of conserved MAU-modified K/R sites in O/DO and FB regions	Number of conserved K/R residues in FB regions	Number of conserved MAU-modified K/R sites in FB regions	Hypergeometric P-value	Number of conserved K/R residues in O/DO and FB regions	Number of conserved MAU-modified K/R sites in O/DO and FB regions	Number of conserved K/R residues in FB regions	Number of conserved MAU-modified K/R sites in FB regions	Hypergeometric P-value	Number of conserved K/R residues in O/DO and FB regions	Number of conserved MAU-modified K/R sites in O/DO and FB regions	Number of conserved K/R residues in FB regions	Number of conserved MAU-modified K/R sites in FB regions	Hypergeometric P-value	Number of conserved K/R residues in O/DO and FB regions	Number of conserved MAU-modified K/R sites in O/DO and FB regions	Number of conserved K/R residues in FB regions	Number of conserved MAU-modified K/R sites in FB regions	Hypergeometric P-value	Number of conserved K/R residues in O/DO and FB regions	Number of conserved MAU-modified K/R sites in O/DO and FB regions	Number of conserved K/R residues in FB regions	Number of conserved MAU-modified K/R sites in FB regions	Hypergeometric P-value	Number of conserved K/R residues in O/DO and FB regions	Number of conserved MAU-modified K/R sites in O/DO and FB regions	Number of conserved K/R residues in FB regions	Number of conserved MAU-modified K/R sites in FB regions	Hypergeometric P-value	Number of conserved K/R residues in O/DO and FB regions	Number of conserved MAU-modified K/R sites in O/DO and FB regions	Number of conserved K/R residues in FB regions	Number of conserved MAU-modified K/R sites in FB regions	Hypergeometric P-value	Number of conserved K/R residues in O/DO and FB regions	Number of conserved MAU-modified K/R sites in O/DO and FB regions	Number of conserved K/R residues in FB regions
Methylation - K	Order	153	82	56	35	0.065172	133	86	49	31	0.673235	102	70	42	29	0.557569	85	62	38	28	0.544058	57	36	23	13	0.871451	38	26	15	9	0.895412	25	22	9	7	0.963478	27	23	8	7	0.662564	34	29	9	8	0.600095	26	16	6
	Disorder	201	78	56	35	2.11973e-05	186	80	49	31	0.000780412	98	61	42	29	0.160513	76	51	38	28	0.164446	52	29	23	13	0.573258	34	19	15	9	0.468158	20	18	9	7	1	19	16	8	7	0.624355	27	19	9	8	0.148722	15	8	6
Methylation - R	Order	135	27	35	15	0.000218448	126	31	32	14	0.00472534	110	22	25	11	0.00149308	83	20	22	11	0.00175719	56	9	13	4	0.11482	21	4	0	0	NA	14	3	0	0	NA	13	3	0	0	NA	17	5	0	0	NA	13	3	0
	Disorder	113	50	35	15	0.655847	127	54	32	14	0.515427	109	41	25	11	0.300619	86	36	22	11	0.257963	71	26	13	4	0.786348	28	14	0	0	NA	4	3	0	0	NA	5	4	0	0	NA	9	6	0	0	NA	5	4	0
Acetylation - K	Order	586	183	171	72	0.000228275	504	172	144	61	0.00952086	385	134	117	51	0.0119174	238	104	92	44	0.187986	198	81	71	33	0.148935	132	52	45	19	0.384371	57	30	16	8	0.70682	35	20	14	6	0.959572	43	23	10	6	0.458561	28	16	6
	Disorder	488	148	171	72	2.98778e-05	421	130	144	61	0.000207177	264	90	117	51	0.00278391	193	74	92	44	0.00730632	155	62	71	33	0.0886496	105	40	45	19	0.290367	25	10	16	8	0.17569	24	8	14	6	0.234486	35	15	10	6	0.179273	19	9	6
Ubiquitination - K	Order	578	169	138	64	6.42744e-07	506	163	124	59	2.77285e-05	402	130	104	49	0.00018369	298	110	83	46	4.08252e-05	249	86	63	31	0.00406161	163	62	39	19	0.0836558	72	36	14	8	0.383403	58	28	14	7	0.562113	53	28	12	6	0.709701	42	18	7
	Disorder	484	142	138	64	3.0915e-07	397	136	124	59	0.000147225	294	101	104	49	0.000560333	204	76	83	46	8.59072e-06	168	60	63	31	0.00403389	103	35	39	19	0.0125417	34	17	14	8	0.364141	31	15	14	7	0.578077	26	16	12	6	0.936654	20	9	7
Table J: Conservation of sites with multiple MAU sites in FB (treated as a sample of ordered or disordered) regions across all eukaryotes		Number of K residues in O/DO regions of FB proteins	Number of MAU-modified sites in O/DO regions of FB proteins	Number of K residues in FB proteins with multiple MAU sites	Number of MAU-modified sites with multiple MAUs in FB regions	Hypergeometric P-value
	Order	2697	160	109	65	1.29152e-56
	Disorder	1296	80	109	65	5.14748e-65
[truncated: 7 more columns]

## Sheet: Table K and Table L
	APES					Primates					Supraprimates					Eutheria					Mammals					Tetrapods					Vertebrates					Chordates					Deuterostomes					Metazoa
Table K: Conservation of MAU sites in and disordered regions(disordered regions predicted by IUPRED) regions across all eukaryotic clade	Number of all K/R residues	Number of all conserved K/R residues	Number of MAU-modified sites	Number of conserved MAU-modified sites	Hypergeometric P-value	Number of all K/R residues	Number of all conserved K/R residues	Number of MAU-modified sites	Number of conserved MAU-modified sites	Hypergeometric P-value	Number of all K/R residues	Number of all conserved K/R residues	Number of MAU-modified sites	Number of conserved MAU-modified sites	Hypergeometric P-value	Number of all K/R residues	Number of all conserved K/R residues	Number of MAU-modified sites	Number of conserved MAU-modified sites	Hypergeometric P-value	Number of all K/R residues	Number of all conserved K/R residues	Number of MAU-modified sites	Number of conserved MAU-modified sites	Hypergeometric P-value	Number of all K/R residues	Number of all conserved K/R residues	Number of MAU-modified sites	Number of conserved MAU-modified sites	Hypergeometric P-value	Number of all K/R residues	Number of all conserved K/R residues	Number of MAU-modified sites	Number of conserved MAU-modified sites	Hypergeometric P-value	Number of all K/R residues	Number of all conserved K/R residues	Number of MAU-modified sites	Number of conserved MAU-modified sites	Hypergeometric P-value	Number of all K/R residues	Number of all conserved K/R residues	Number of MAU-modified sites	Number of conserved MAU-modified sites	Hypergeometric P-value	Number of all K/R residues	Number of all conserved K/R residues	Number of MAU-modified sites	Number of conserved MAU-modified sites
Methylation- K	12655	11799	496	465	0.362	12029	8696	476	387	2.19e-06	8950	5374	428	283	0.00465779	6659	3566	264	176	6.97252e-06	4703	2168	179	135	3.88279e-16	3209	1044	165	74	0.00046786	1598	522	107	36	0.449336	740	170	52	23	0.000345796	609	130	35	16	0.000773015	256	19	28	8
Methylation -R	18016	15946	1536	1344	0.105	16316	12264	1448	1150	3.72e-05	13676	8696	1343	928	4.56219e-06	10325	6016	1084	604	0.966143	8042	4069	920	519	9.99063e-05	7511	2561	859	306	0.167358	5423	809	593	117	0.000449654	1352	310	212	52	0.300743	934	192	128	25	0.660064	484	20	75	8
Acetylation- K	62538	57336	4954	4568	0.084	59900	44058	4800	3647	3.28e-05	46679	27662	4396	2634	0.179641	31479	17904	3134	1556	1	24436	10837	2348	1304	1.79579e-30	18792	5543	2188	813	1.40487e-16	9805	2149	1485	339	0.18726	5522	874	592	179	4.75394e-21	4443	553	389	101	1.63624e-14	798	59	297	8
Ubiquitination - K	47080	43189	5091	4729	0.000698	44454	32894	4950	3641	0.778385	28917	17361	4585	2577	1	23857	12720	2892	1433	0.999993	15796	7220	2137	1188	4.55221e-23	13281	4210	1915	697	1.27526e-06	8907	1513	1242	304	2.26013e-13	3276	611	559	155	4.17898e-09	2490	392	345	84	4.64706e-06	825	57	214	22
	APES					Primates					Supraprimates					Eutheria					Mammals					Tetrapods					Vertebrates					Chordates					Deuterostomes					Metazoa
Table L: Conservation of MAU sites in disordered regions across all eukaryotic clade, sequences are aligned using KMAD alignment tool	Number of all K/R residues	Number of all conserved K/R residues	Number of MAU-modified sites	Number of conserved MAU-modified sites	Hypergeometric P-value	Number of all K/R residues	Number of all conserved K/R residues	Number of MAU-modified sites	Number of conserved MAU-modified sites	Hypergeometric P-value	Number of all K/R residues	Number of all conserved K/R residues	Number of MAU-modified sites	Number of conserved MAU-modified sites	Hypergeometric P-value	Number of all K/R residues	Number of all conserved K/R residues	Number of MAU-modified sites	Number of conserved MAU-modified sites	Hypergeometric P-value	Number of all K/R residues	Number of all conserved K/R residues	Number of MAU-modified sites	Number of conserved MAU-modified sites	Hypergeometric P-value	Number of all K/R residues	Number of all conserved K/R residues	Number of MAU-modified sites	Number of conserved MAU-modified sites	Hypergeometric P-value	Number of all K/R residues	Number of all conserved K/R residues	Number of MAU-modified sites	Number of conserved MAU-modified sites	Hypergeometric P-value	Number of all K/R residues	Number of all conserved K/R residues	Number of MAU-modified sites	Number of conserved MAU-modified sites	Hypergeometric P-value	Number of all K/R residues	Number of all conserved K/R residues	Number of MAU-modified sites	Number of conserved MAU-modified sites	Hypergeometric P-value	Number of all K/R residues	Number of all conserved K/R residues	Number of MAU-modified sites	Number of conserved MAU-modified sites
Methylation- K	16233	14097	640	593	1.35624e-06	16073	7940	636	503	8.84475e-56	12179	3424	533	361	2.98985e-84	7255	1828	400	272	4.03582e-77	7095	1554	311	232	4.67843e-92	4658	623	222	102	2.86678e-34	2907	224	149	61	6.43036e-32	1192	142	75	37	6.36994e-17	600	116	47	18	0.00125772	339	12	42	10
Methylation -R	31942	28338	1485	1303	0.894407	20978	14879	1472	1128	2.05849e-07	15599	9822	1246	893	9.1611e-12	12866	6768	1133	893	1.60885e-81	10450	5521	962	564	8.65353e-05	7254	2273	697	247	0.00832594	4696	840	473	107	0.00340711	1276	227	163	47	0.000129814	419	36	57	17	2.32058e-07	390	24	35	5
Acetylation- K	74969	63338	5441	5012	2.57977e-68	74572	36159	5420	4084	0	62179	17001	4731	2939	0	50353	8218	4012	2144	0	38696	5830	3251	1876	0	27444	2038	2375	904	0	17864	1091	1681	465	1.27952e-204	7113	624	728	197	5.81446e-55	2186	143	327	96	5.55048e-50	2172	54	244	12
Ubiquitination - K	58235	49488	5990	5534	9.00277e-75	58046	28888	5986	4515	0	48442	13728	5218	3182	0	36586	6661	4314	2292	0	28260	4642	3439	1980	0	19305	1495	2352	923	0	13222	677	1735	484	1.30105e-290	5714	454	833	254	1.78401e-105	1699	175	411	108	4.2428e-47	1462	43	274	33
[truncated: 6 more columns]

## Sheet: No. of HumanProts in each clade
	No. of proteins with conserved MAU sites in each clade	Apes	Primates	Supraprimates	Eutherian	Mammals	Tetrapods	Vertebrates	Chordates	Deuterostomes	Metazoan	Eukaryotes
Methylation- K	Order	228	220	151	116	101	75	50	33	27	15	10
	Disorder	400	391	206	142	121	78	44	28	22	9	2
Methylation -R	Order	140	134	94	66	51	36	23	14	13	8	6
	Disorder	591	568	362	270	238	157	78	37	31	12	1
Acetylation- K	Order	1871	1854	1265	935	833	589	407	269	242	123	77
	Disorder	2266	2239	1320	921	807	514	262	150	118	20	10
Ubiquitination - K	Order	2713	2704	1537	1512	1392	1039	756	490	434	247	167
	Disorder	2730	2717	1971	1067	935	594	333	190	152	52	20
